# Supplementary material for: Blood Plasma Exosomes Contain Circulating DNA in Their Crown
Source: MDPI journal article supplement (doi:10.3390/diagnostics12040854), 2022-03-30
Supplement: s1 [file s1]

**Table S2.** Exosomal proteins identified in the BCP plasma\*

| Uniprot       | Protein                                                                      | Gene Name            |
|---------------|------------------------------------------------------------------------------|----------------------|
| P69905        | Haptoglobin alpha chain                                                      |                      |
| O75027        | <i>ATP-binding cassette sub-family B member 7, mitochondrial</i>             | <i>ABCB7</i>         |
| P11310        | <i>Medium-chain specific acyl-CoA dehydrogenase, mitochondrial</i>           | <i>ACADM</i>         |
| Q53FZ2        | Acyl-coenzyme A synthetase ACSM3, mitochondrial                              | ACSM3                |
| <b>O14672</b> | <b><i>Disintegrin and metalloproteinase domain-containing protein 10</i></b> | <b><i>ADAM10</i></b> |
| <b>P78536</b> | <b><i>Disintegrin and metalloproteinase domain-containing protein 17</i></b> | <b><i>ADAM17</i></b> |
| <b>P02765</b> | <b><i>Alpha-2-HS-glycoprotein</i></b>                                        | <b><i>AHSG</i></b>   |
| <b>P02768</b> | <b><i>Serum albumin</i></b>                                                  | <b><i>ALB</i></b>    |
| <b>P02760</b> | <b><i>Alpha-1-microglycoprotein</i></b>                                      | <b><i>AMBP</i></b>   |
| Q5CZ79        | Ankyrin repeat domain-containing protein 20B                                 | ANKRD20A8P           |
| Q9BYT9        | Anoctamin-3                                                                  | ANO3                 |
| <b>P02647</b> | <b><i>Apolipoprotein A-I</i></b>                                             | <b><i>APOA1</i></b>  |
| P06727        | Apolipoprotein A-IV                                                          | APOA4                |
| <b>P04114</b> | <b><i>Apolipoprotein B-100</i></b>                                           | <b><i>APOB</i></b>   |
| Q9P291        | Armadillo repeat-containing X-linked protein 1                               | ARMCX1               |
| <b>O75531</b> | <b><i>Barrier-to-autointegration factor</i></b>                              | <b><i>BANF1</i></b>  |
| P18075        | Bone morphogenetic protein 7                                                 | BMP7                 |
| <b>P01024</b> | <b><i>Complement C3</i></b>                                                  | <b><i>C3</i></b>     |
| O00555        | Voltage-dependent P/Q-type calcium channel subunit alpha-1A                  | CACNA1A              |
| P17655        | Calpain-2 catalytic subunit                                                  | CAPN2                |
| Q5M9N0        | Coiled-coil domain-containing protein 158                                    | CCDC158              |
| <b>P25063</b> | <b><i>Signal transducer CD24</i></b>                                         | <b><i>CD24</i></b>   |
| <b>P08962</b> | <b><i>CD63 antigen</i></b>                                                   | <b><i>CD63</i></b>   |
| <b>P60033</b> | <b><i>CD81 antigen</i></b>                                                   | <b><i>CD81</i></b>   |
| <b>P21926</b> | <b><i>CD9 antigen</i></b>                                                    | <b><i>CD9</i></b>    |
| Q5VT06        | Centrosome-associated protein 350                                            | CEP350               |
| P17540        | Creatine kinase S-type, mitochondrial                                        | CKMT2                |
| <b>P10909</b> | <b><i>Clusterin</i></b>                                                      | <b><i>CLU</i></b>    |
| P02489        | Alpha-crystallin A chain                                                     | CRYAA                |
| A0A140G945    | Alpha-crystallin A2 chain                                                    | CRYAA2               |
| P02511        | Alpha-crystallin B chain                                                     | CRYAB                |
| O00429        | Dynamin-1-like protein                                                       | DNM1L                |
| Q9Y4J8        | Dystrobrevin alpha                                                           | DTNA                 |
| Q8N9H8        | Exonuclease mut-7 homolog                                                    | EXD3                 |
| Q8IYI6        | Exocyst complex component 8                                                  | EXOC8                |
| <b>Q8TES7</b> | <b><i>Fas-binding factor 1</i></b>                                           | <b><i>FBF1</i></b>   |
| <b>P02679</b> | <b><i>Fibrinogen gamma chain</i></b>                                         | <b><i>FGG</i></b>    |
| <b>P06396</b> | <b><i>Gelsolin</i></b>                                                       | <b><i>GSN</i></b>    |
| Q9NYZ3        | G2 and S phase-expressed protein 1                                           | GTSE1                |
| <b>P68871</b> | <b><i>Hemoglobin subunit beta</i></b>                                        | <b><i>HBB</i></b>    |
| Q9NWT6        | Hypoxia-inducible factor 1-alpha inhibitor                                   | HIF1AN               |
| <b>P00738</b> | <b><i>Haptoglobin</i></b>                                                    | <b><i>HP</i></b>     |
| <b>P00739</b> | <b><i>Haptoglobin-related protein</i></b>                                    | <b><i>HPR</i></b>    |
| <b>P02790</b> | <b><i>Hemopexin</i></b>                                                      | <b><i>HPX</i></b>    |

|               |                                                         |                |
|---------------|---------------------------------------------------------|----------------|
| P11717        | <i>Cation-independent mannose-6-phosphate receptor</i>  | IGF2R          |
| P01876        | Immunoglobulin heavy constant alpha 1                   | IGHA1          |
| P01857        | Immunoglobulin heavy constant gamma 1                   | IGHG1          |
| P01834        | Immunoglobulin kappa constant                           | IGKC           |
| P01619        | Immunoglobulin kappa light chain                        | IGKV3-20       |
| Q9Y2W7        | <i>Calsenilin</i>                                       | KCNIP3         |
| Q96Q89        | <i>Kinesin-like protein KIF20B</i>                      | KIF20B         |
| O15066        | <i>Kinesin-like protein KIF3B</i>                       | KIF3B          |
| Q9BVG8        | <i>Kinesin-like protein KIFC3</i>                       | KIFC3          |
| <b>P02750</b> | <b><i>Leucine-rich alpha-2-glycoprotein</i></b>         | <b>LRG</b>     |
| Q96EY8        | <i>Corrinoid adenosyltransferase</i>                    | MMAB           |
| Q86TS9        | <i>39S ribosomal protein L52, mitochondrial</i>         | MRPL52         |
| P11586        | <i>C-1-tetrahydrofolate synthase, cytoplasmic</i>       | MTHFD1         |
| Q8NFA2        | NADPH oxidase organizer 1                               | NOXO1          |
| P0CE72        | Oncomodulin-1                                           | OCM            |
| Q29RF7        | <i>Sister chromatid cohesion protein PDS5 homolog A</i> | PDS5A          |
| Q8WXW3        | <i>Progesterone-induced-blocking factor 1</i>           | PIBF1          |
| O15514        | DNA-directed RNA polymerase II subunit RPB4             | POLR2D         |
| Q8NEY8        | Periphrin-1                                             | PPHLN1         |
| Q969Q5        | <i>Ras-related protein Rab-24</i>                       | RAB24          |
| P46779        | <i>60S ribosomal protein L28</i>                        | RPL28          |
| P01009        | <i>Alpha-1-antitrypsin</i>                              | SERPINA1       |
| Q5VZ18        | SH2 domain-containing adapter protein E                 | SHE            |
| Q9BT92        | <i>Trichoplein keratin filament-binding protein</i>     | TCHP           |
| P02787        | <i>Serotransferrin</i>                                  | TF             |
| Q9NQ34        | <i>Transmembrane protein 9B</i>                         | TMEM9B         |
| <b>O43399</b> | <b><i>Tumor protein D54</i></b>                         | <b>TPD52L2</b> |
| O15050        | <i>TPR and ankyrin repeat-containing protein 1</i>      | TRANK1         |
| <b>P02766</b> | <b><i>Transthyretin</i></b>                             | <b>TTR</b>     |
| Q9UKW4        | <i>Guanine nucleotide exchange factor VAV3</i>          | VAV3           |
| Q96RL7        | <i>Vacuolar protein sorting-associated protein 13A</i>  | VPS13A         |
| Q969S3        | <i>Zinc finger protein 622</i>                          | ZNF622         |
| Q14966        | <i>Zinc finger protein 638</i>                          | ZNF638         |

\* - universal plasma exosome proteins of HFs and BCPs are in bold type, proteins previously identified in the Vesiclepedia database are marked in italics.
