# Supplementary material for: Blood Plasma Exosomes Contain Circulating DNA in Their Crown
Source: MDPI journal article supplement (doi:10.3390/diagnostics12040854), 2022-03-30
Supplement: s1 [file s1]

**Table S1.** Exosomal proteins identified in the HF plasma\*

| Uniprot ID    | Protein                                                                      | Gene          |
|---------------|------------------------------------------------------------------------------|---------------|
| P0DOX6        | Immunoglobulin mu heavy chain                                                |               |
| P01023        | <i>Alpha-2-macroglobulin</i>                                                 | A2M           |
| Q4LEZ3        | <i>Alanine and arginine-rich domain-containing protein</i>                   | AARD          |
| <b>O14672</b> | <b><i>Disintegrin and metalloproteinase domain-containing protein 10</i></b> | <b>ADAM10</b> |
| <b>P78536</b> | <b><i>Disintegrin and metalloproteinase domain-containing protein 17</i></b> | <b>ADAM17</b> |
| <b>P02765</b> | <b><i>Alpha-2-HS-glycoprotein</i></b>                                        | <b>AHSG</b>   |
| O95831        | <i>Apoptosis-inducing factor 1, mitochondrial</i>                            | AIFM1         |
| O14862        | Interferon-inducible protein AIM2                                            | AIM2          |
| <b>P02768</b> | <b><i>Serum albumin</i></b>                                                  | <b>ALB</b>    |
| <b>P02760</b> | <b><i>Alpha-1-microglycoprotein</i></b>                                      | <b>AMBP</b>   |
| P23109        | AMP deaminase 1                                                              | AMPD1         |
| <b>P02647</b> | <b><i>Apolipoprotein A-I</i></b>                                             | <b>APOA1</b>  |
| P06727        | Apolipoprotein A-IV                                                          | APOA4         |
| <b>P04114</b> | <b><i>Apolipoprotein B-100</i></b>                                           | <b>APOB</b>   |
| P02649        | Apolipoprotein E                                                             | APOE          |
| <b>O75531</b> | <b><i>Barrier-to-autointegration factor</i></b>                              | <b>BANF1</b>  |
| Q99728        | BRCA1-associated RING domain protein 1                                       | BARD1         |
| <b>P01024</b> | <b><i>Complement C3</i></b>                                                  | <b>C3</b>     |
| Q8N5S9        | Calcium/calmodulin-dependent protein kinase kinase 1                         | CAMKK1        |
| Q96PX6        | <i>Coiled-coil domain-containing protein 85A</i>                             | CCDC85A       |
| <b>P25063</b> | <b><i>Signal transducer CD24</i></b>                                         | <b>CD24</b>   |
| <b>P08962</b> | <b><i>CD63 antigen</i></b>                                                   | <b>CD63</b>   |
| <b>P60033</b> | <b><i>CD81 antigen</i></b>                                                   | <b>CD81</b>   |
| <b>P21926</b> | <b><i>CD9 antigen</i></b>                                                    | <b>CD9</b>    |
| A0A1B0GU71    | Uncharacterized protein CFAP97D2                                             | CFAP97D       |
| P08603        | Complement factor H                                                          | CFH           |
| Q8TDI0        | <i>Chromodomain-helicase-DNA-binding protein 5</i>                           | CHD5          |
| F8VUA8        | Uncharacterized protein CLBA1                                                | CLBA1         |
| <b>P10909</b> | <b><i>Clusterin</i></b>                                                      | <b>CLU</b>    |
| P61201        | COP9 signalosome complex subunit 2                                           | COPS2         |
| Q6QEF8        | Coronin-6                                                                    | CORO6         |
| P12074        | Cytochrome c oxidase subunit 6A1, mitochondrial                              | COX6A1        |
| <b>Q8TES7</b> | <b><i>Fas-binding factor 1</i></b>                                           | <b>FBF1</b>   |
| P02671        | <i>Fibrinogen alpha chain</i>                                                | FGA           |
| P02675        | <i>Fibrinogen beta chain</i>                                                 | FGB           |
| O15520        | <i>Fibroblast growth factor 10</i>                                           | FGF10         |
| <b>P02679</b> | <b><i>Fibrinogen gamma chain</i></b>                                         | <b>FGG</b>    |
| P02751        | <i>Fibronectin</i>                                                           | FN1           |
| Q96DB9        | <i>FXYD domain-containing ion transport regulator 5</i>                      | FXYD5         |
| O60861        | <i>Growth arrest-specific protein 7</i>                                      | GAS7          |
| <b>P06396</b> | <b><i>Gelsolin</i></b>                                                       | <b>GSN</b>    |
| O96004        | Heart- and neural crest derivatives-expressed protein 1                      | HAND1         |
| <b>P68871</b> | <b><i>Hemoglobin subunit beta</i></b>                                        | <b>HBB</b>    |
| <b>P00738</b> | <b><i>Haptoglobin</i></b>                                                    | <b>HP</b>     |
| <b>P00739</b> | <b><i>Haptoglobin-related protein</i></b>                                    | <b>HPR</b>    |
| <b>P02790</b> | <b><i>Hemopexin</i></b>                                                      | <b>HPX</b>    |
| P01859        | Ig gamma-2 chain C region                                                    | IGHG2         |
| P01871        | Ig mu chain C region                                                         | IGHM          |

|               |                                                                                       |                |
|---------------|---------------------------------------------------------------------------------------|----------------|
| P01834        | Ig kappa chain C region                                                               | IGKC           |
| A0M8Q6        | Ig lambda-7 chain C region                                                            | IGLC7          |
| <b>P02750</b> | <b><i>Leucine-rich alpha-2-glycoprotein</i></b>                                       | <b>LRG</b>     |
| H0YGS3        | Microfibrillar-associated protein 5                                                   | MFAP5          |
| Q16674        | <i>Melanoma-derived growth regulatory protein</i>                                     | MIA            |
| Q8N159        | <i>N-acetylglutamate synthase, mitochondrial</i>                                      | NAGS           |
| P60323        | Nanos homolog 3                                                                       | NANOS3         |
| P55209        | <i>Nucleosome assembly protein 1-like 1</i>                                           | NAP1L1         |
| O43678        | <i>NADH dehydrogenase [ubiquinone] 1 alpha subcomplex subunit 2</i>                   | NDUFA2         |
| Q9GZT8        | <i>NIF3-like protein 1</i>                                                            | NIF3L1         |
| Q9HCQ7        | <i>Pro-FMRamide-related neuropeptide VF</i>                                           | NPVF           |
| P56373        | P2X purinoceptor 3                                                                    | P2RX3          |
| O00329        | <i>Phosphatidylinositol 4,5-bisphosphate 3-kinase catalytic subunit delta isoform</i> | PIK3CD         |
| P78356        | <i>Phosphatidylinositol 4-kinase type 2-beta</i>                                      | PIP4K2B        |
| Q6IQ23        | <i>Pleckstrin homology domain-containing family A member 7</i>                        | PLEKHA7        |
| P11801        | <i>Serine/threonine-protein kinase H1</i>                                             | PSKH1          |
| Q9UL26        | <i>Ras-related protein Rab-22A</i>                                                    | RAB22A         |
| Q8WXH6        | Ras-related protein Rab-40A                                                           | RAB40A         |
| P61224        | <i>Ras-related GTP-binding protein B</i>                                              | RAP1B          |
| Q8TDF6        | RAS guanyl-releasing protein 4                                                        | RASGRP4        |
| P50749        | <i>Ras association domain-containing protein 2</i>                                    | RASSF2         |
| O75526        | <i>RNA-binding motif protein, X-linked-like-2</i>                                     | RBMXL2         |
| P40938        | <i>Replication factor C subunit 3</i>                                                 | RFC3           |
| Q969K3        | <i>E3 ubiquitin-protein ligase RNF34</i>                                              | RNF34          |
| Q13424        | Alpha-1-syntrophin                                                                    | SNTA1          |
| P02787        | Serotransferrin                                                                       | TF             |
| Q9NUR3        | Transmembrane protein 74B                                                             | TMEM74B        |
| O43557        | Tumor necrosis factor ligand superfamily member 14                                    | TNFSF14        |
| <b>O43399</b> | <b><i>Tumor protein D54</i></b>                                                       | <b>TPD52L2</b> |
| <b>P02766</b> | <b><i>Transthyretin</i></b>                                                           | <b>TTR</b>     |
| P43403        | <i>Tyrosine-protein kinase ZAP-70</i>                                                 | ZAP70          |
| Q15776        | Zinc finger protein with KRAB and SCAN domains 8                                      | ZKSCAN8        |
| Q9Y2P0        | Zinc finger protein 835                                                               | ZNF835         |
| O43309        | Zinc finger and SCAN domain-containing protein 12                                     | ZSCAN12        |

\* - universal plasma exosome proteins of HFs and BCPs are in bold type, proteins previously identified in the Vesiclepedia database are marked in italics.
